# Supplementary material for: Spurious transcription causing innate immune responses is prevented by 5-hydroxymethylcytosine
Source: PubMed Central journal article supplement (PMC9839451; doi:10.1038/s41588-022-01252-3), 2022-12-20

Fig. 3a

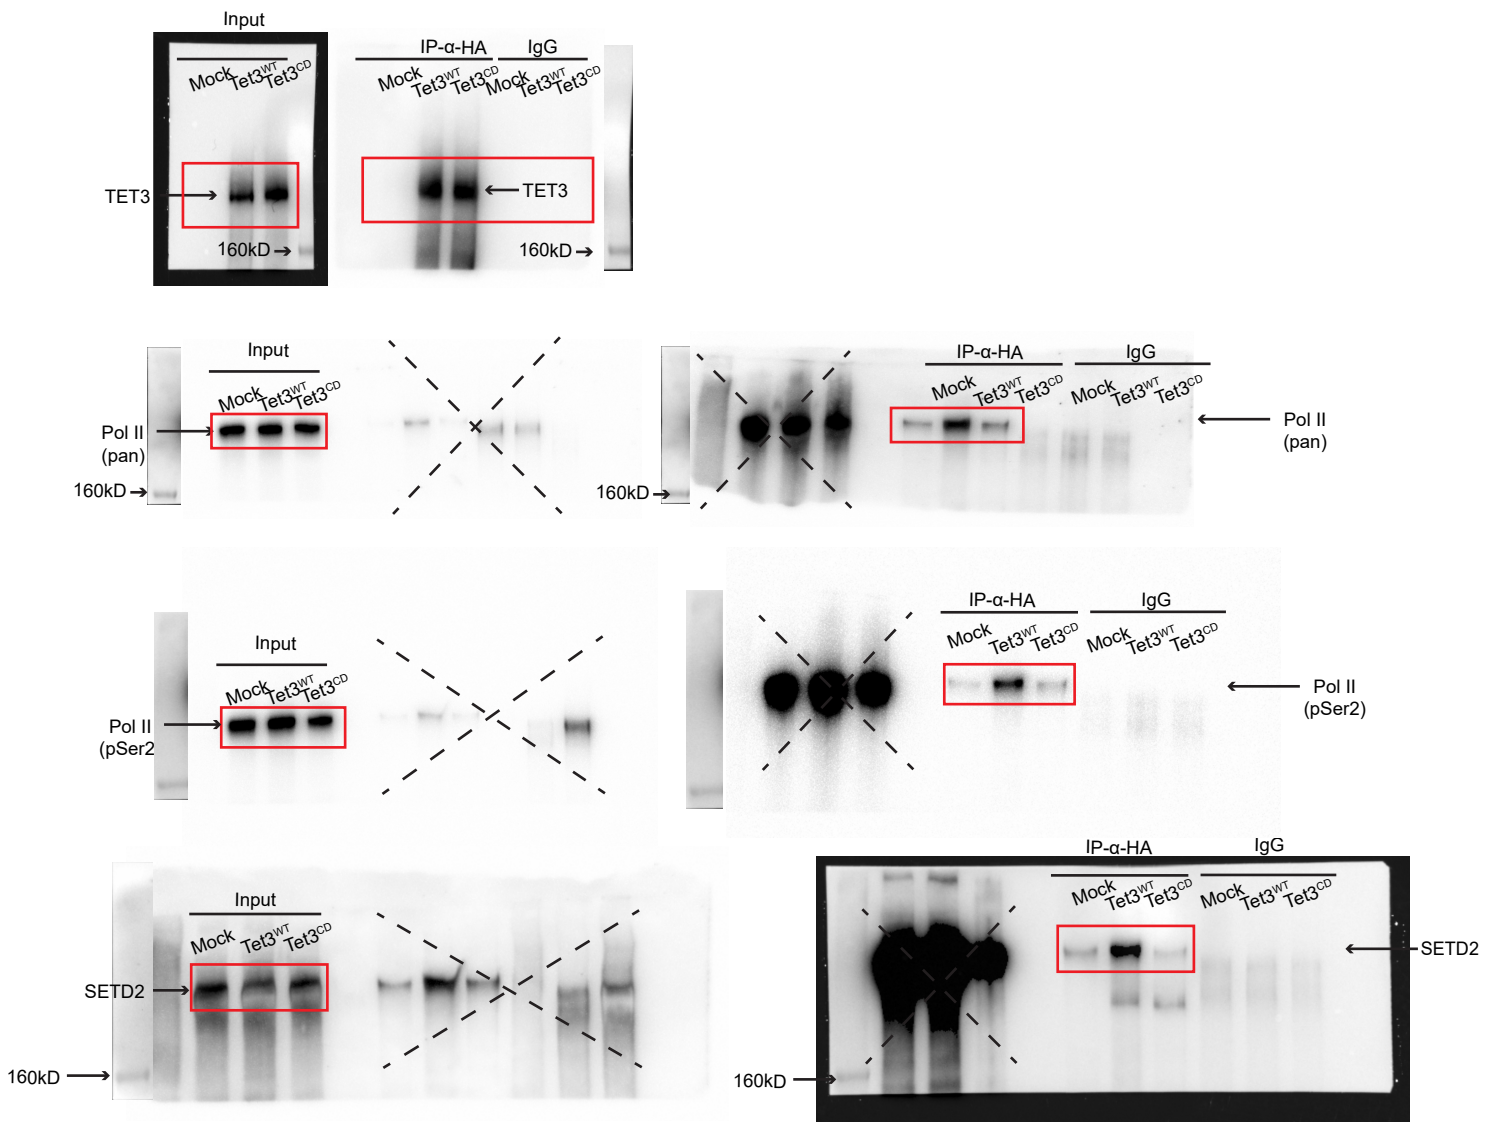

Fig. 3c

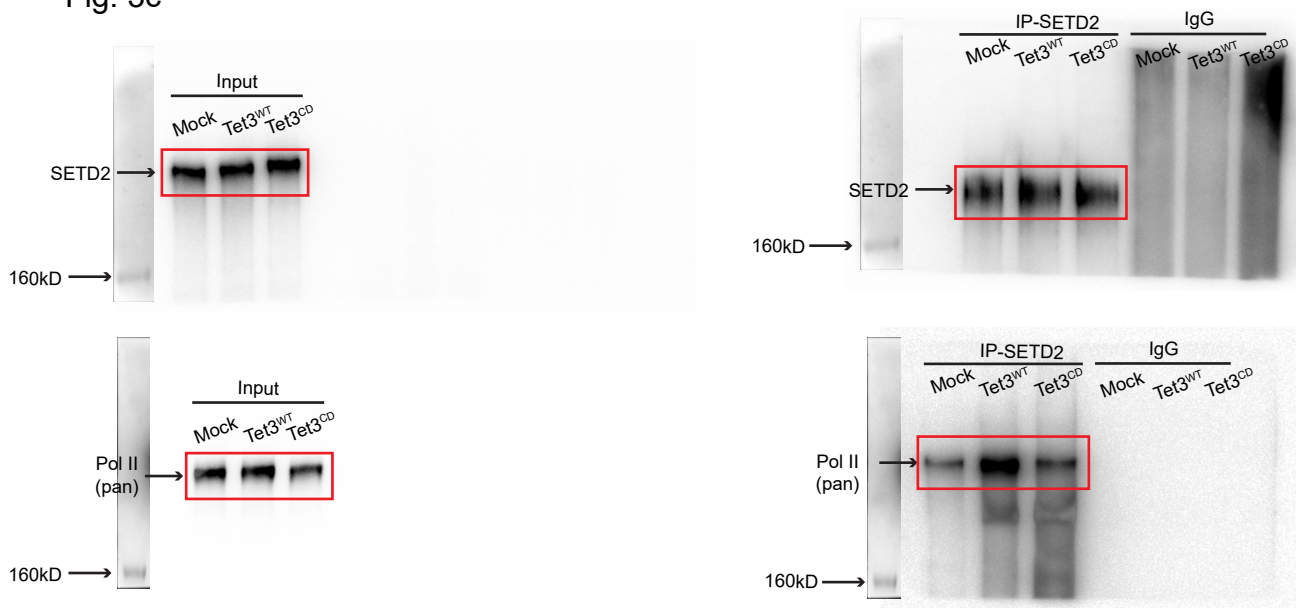

Supplement: 41588_2022_1252_MOESM9_ESM.pdf [file 41588_2022_1252_MOESM9_ESM.pdf]
