# Supplementary material for: Spurious transcription causing innate immune responses is prevented by 5-hydroxymethylcytosine
Source: PubMed Central journal article supplement (PMC9839451; doi:10.1038/s41588-022-01252-3), 2022-12-20

Extended data Fig. 2b

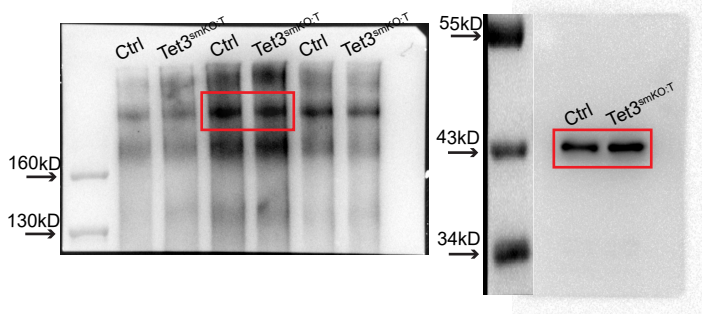

Extended data Fig. 2h

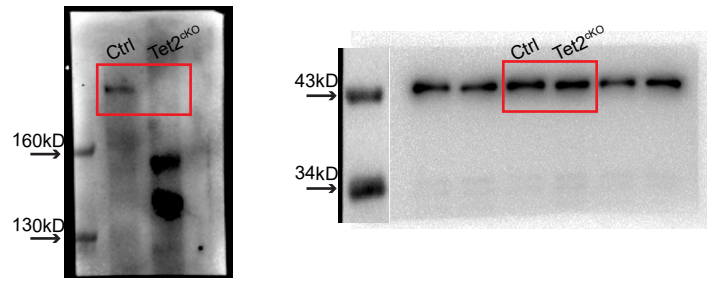

Extended data Fig. 2d

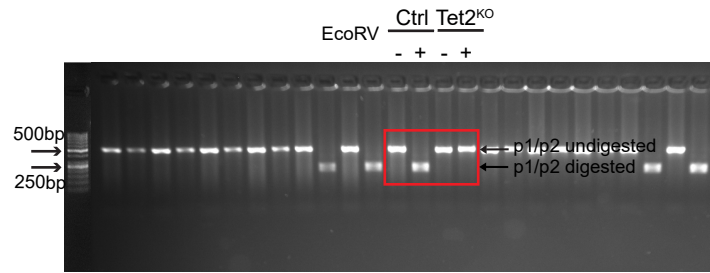

Supplement: 41588_2022_1252_MOESM19_ESM.pdf [file 41588_2022_1252_MOESM19_ESM.pdf]
